# Supplementary material for: Obese Mice Lacking Inducible Nitric Oxide Synthase Are Sensitized to the Metabolic Actions of Peroxisome Proliferator–Activated Receptor-γ Agonism
Source: Oxford University Press journal article supplement (doi:10.2337/db08-0540), 2008-05-06
Supplement: db080540-sup-suppfigs.doc [file db080540-sup-suppfigs.doc]

**Supplementary Figures:**

**
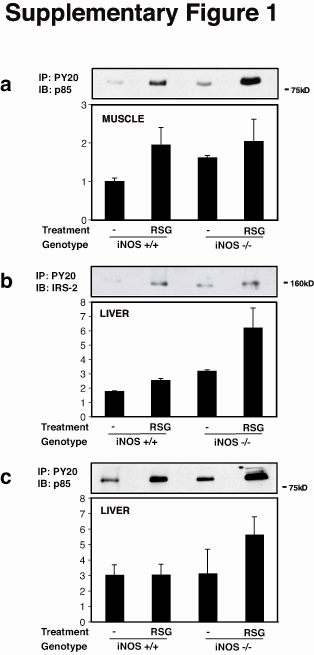
**

**Supplementary Fig. 1. Effect of iNOS gene disruption and rosiglitazone on proximal insulin signaling in muscle and liver of high fat-fed mice**. Mice were injected with insulin. Four minutes post-injection p85 binding to IRS-1/2 (**a, c**) and IRS-2 tyrosine phosphorylation (**b**) were evaluated after immunoprecipitation with PY20, followed by western blot using antibodies against p85 or IRS-2. Mean  SE of 4-5 mice per group.

**
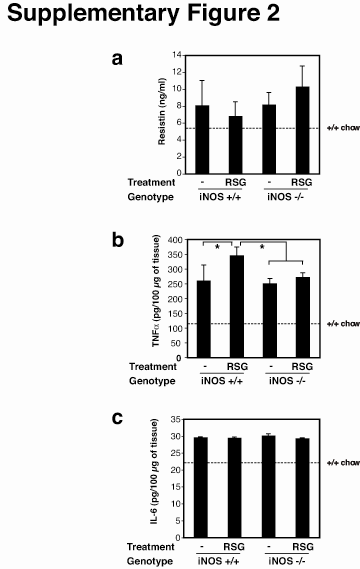
**

**Supplementary Fig. 2 : Effect of iNOS gene disruption and rosiglitazone on resistin and adipose tissue TNF- and IL-6 contents in high fat-fed mice**. **(a)**. Resistin levels were determined in the plasma. TNF- (**b**) and IL-6 (**c**) protein levels were determined by ELISA in extracts of white adipose tissue. Shown are means  SE (n=3-5), * : p  0.05 vs indicated groups.
